# Supplementary material for: Lifestyle factors and risk of sickness absence from work: a multicohort study
Source: PubMed Central journal article supplement (PMC6220357; doi:10.1016/s2468-2667(18)30201-9), 2018-11-05
Supplement: mmc1.pdf [file mmc1.pdf]

# THE LANCET

## Public Health

### **Supplementary appendix**

This appendix formed part of the original submission and has been peer reviewed. We post it as supplied by the authors.

Supplement to: Virtanen M, Ervasti J, Head J, et al. Lifestyle factors and risk of sickness absence from work: a multicohort study. *Lancet Public Health* 2018; **3**: e545–54.

## Supplementary appendix

Supplement to: Virtanen M, Ervasti J, Head J, et al. Lifestyle and risk of absence from work due to specific diagnoses: A multi-cohort study. *Lancet Public Health*

| <b>Contents</b>                                                                                                                                                                                                                                                   | <b>Page</b> |
|-------------------------------------------------------------------------------------------------------------------------------------------------------------------------------------------------------------------------------------------------------------------|-------------|
| Description of lifestyle factors                                                                                                                                                                                                                                  | 2           |
| Description of sickness absence                                                                                                                                                                                                                                   | 3           |
| Description of covariates                                                                                                                                                                                                                                         | 5           |
| Description of Population Attributable fraction (PAF)                                                                                                                                                                                                             | 6           |
| Supplementary Table 1: Rate ratio (RR) and 95% confidence intervals (CI) for association between lifestyle factors and sickness absence due to musculoskeletal diseases in each study cohort                                                                      | 7           |
| Supplementary Table 2: Rate ratio (RR) and 95% confidence intervals (CI) for association between lifestyle factors and sickness absence due to depressive disorders in each study cohort                                                                          | 8           |
| Supplementary Table 3: Rate ratio (RR) and 95% confidence intervals (CI) for association between lifestyle factors and sickness absence due to external causes in each study cohort                                                                               | 9           |
| Supplementary Table 4: Rate ratio (RR) and 95% confidence intervals (CI) for association between lifestyle factors and sickness absence due to circulatory diseases in each study cohort                                                                          | 10          |
| Supplementary Table 5: Rate ratio (RR) and 95% confidence intervals (CI) for association between lifestyle factors and sickness absence due to respiratory diseases each study cohort                                                                             | 11          |
| Supplementary Table 6: Rate ratio (RR) and 95% confidence intervals (CI) for association between lifestyle factors and sickness absence due to digestive diseases in each study cohort                                                                            | 12          |
| Supplementary Figure 1: Rate ratio (RR) and 95% confidence intervals (CI) from meta-analyses for association between lifestyle factors and diagnosis-specific sickness absence in the subgroups of sick-listed participants                                       | 13          |
| Supplementary Figure 2: Rate ratio (RR) and 95% confidence intervals (CI) from meta-analyses for association between lifestyle factors and diagnosis-specific sickness absence in the subgroups of sick-listed participants                                       | 14          |
| Supplementary Table 7: Summary estimates from meta-analyses for association between lifestyle factors and sickness absence days due to specific diagnoses in the total population of three cohort studies (FPS, HeSSup, Gazel), excluding the Whitehall II cohort | 15          |
| Supplementary Table 8: Summary estimates from meta-analyses for association between lifestyle factors and sickness absence days due to specific diagnoses in the total population of three cohort studies (FPS, HeSSup, Whitehall), excluding the GAZEL cohort    | 16          |

## Description of lifestyle factors

Smoking was based on self-reports in all cohorts, and was dichotomized into current smokers or non-smokers. Alcohol use was based on self-reported average weekly consumption. We defined high alcohol consumption as weekly consumption exceeding 112g of absolute alcohol for both men and women, according to the most recent guidelines in the United Kingdom.<sup>1</sup> Moderate alcohol consumption referred to >0g and ≤112g/week. Heavy episodic drinking was defined if a participant reported having passed out at least once due to heavy drinking during the past 12 months (available in FPS and HeSSup study cohorts). Body mass index (BMI) was based on self-reported height and weight in FPS, HeSSup, and GAZEL and measured at the study clinic in the Whitehall II study. Leisure-time physical activity was based on self-reports in all cohorts. In FPS and HeSSup, physical activity was based on questions about average hours per week spent briskly walking, jogging or running, and low physical activity was defined as less than 0.5 hour of each. In GAZEL, physical activity was based on a question about practising any sport, from which the responses 'yes, competitively', 'yes, regularly', and 'yes, occasionally' indicated intermediate/high activity and 'no' indicated low physical activity. In Whitehall II, participants were asked about the duration and frequency per week spent doing light, moderate and vigorous intensity physical activity. Physical activity was then categorised as high activity (≥2.5 hours/week of moderate or ≥1 hour/week of vigorous physical activity), low activity (<1 hour/week of moderate and <1 hour/week of vigorous physical activity) or intermediate activity (if not active or inactive).<sup>2</sup>

## References

1. UK Chief Medical Officers. UK Chief Medical Officers' Low Risk Drinking Guidelines 20162016. <https://www.gov.uk/government/publications/alcohol-consumption-advice-on-low-risk-drinking> (accessed September 9, 2018).
2. Stringhini S, Sabia S, Shipley M, et al. Association of socioeconomic position with health behaviors and mortality. *JAMA* 2010; **303**(12): 1159-66.

## Description of sickness absence

Sickness absence was measured as the number of diagnosis-specific sickness absence days during the follow-up period, derived from health registers in all cohorts. In FPS and HeSSup, register information on the dates of medically-certified sickness absence (sick leave, rehabilitation and disability allowance) exceeding nine days was available from the Social Insurance Institution of Finland and the Finnish Centre for Pensions and merged into single datasets. These institutions do not collect data on shorter absences. These were followed up from January 1, 2004 to December 31, 2010 in HeSSup and from January 1, 2005 to December 31, 2011 in FPS. In GAZEL, the information on annual days of medically certified sickness absence was obtained from the employer's records for a follow-up period from January 1, 1998 to December 31, 2004. In GAZEL, a medical certificate was required from day 1, and the data included all episodes of sickness absence irrespective of length. However, the cause of sickness absence was missing for 50% of absences of fewer than 7 days.<sup>1</sup> In Whitehall II, information on all sickness absence was obtained from the Civil Service (employer) records for those (93%) employees who gave consent to have their sickness absence monitored, for a follow-up period from 1991-1994 (survey wave) until the end of 1998. In Whitehall II, the sickness absence data included both short-term (1-7 days) and long-term (>7 days) absences. The cause of absence was self-reported in shorter absences whereas for absences longer than seven calendar days, a medical certificate was required. In all cohorts, the sickness absence data included start and end dates for each absence episode. From this information, we calculated the number of diagnosis-specific days for the whole follow-up, which was until either death, old-age pension, or the end of follow-up. In the Whitehall II and GAZEL cohort studies, which relied on the sickness absence records obtained from employer's registers, follow-up was terminated if the participant changed jobs.

Diagnoses of sickness absence were coded according to ICD-10<sup>2</sup> in HeSSup, GAZEL, and FPS. We used codes F00-F99 to define mental and behavioural disorder-related sickness absences; I00-I99 to define sickness absences due to diseases of the circulatory system; J00-J99 to define sickness

absences due to diseases of the respiratory system; K00-K93 to define sickness absences due to diseases of the digestive system; M00-M99 to define sickness absences due to diseases of the musculoskeletal system and connective tissue; and S00-T98 to define sickness absences due to injury, poisoning and certain other consequences of external causes. In Whitehall II, diagnoses were recorded by the civil service using a detailed coding system (586 possible codes) adapted from the ICD-8 classification. These codes were converted to a smaller number of disease categories using the morbidity coding system of the Royal College of General Practitioners (RCGP).<sup>3</sup> For this study, we used the following RCGP categories 'Diseases of the musculoskeletal system and connective tissue', 'Diseases of digestive system', 'Diseases of respiratory system', and 'Injury and Poisoning'. We combined the categories 'Cardiovascular', 'Cerebrovascular' and 'Peripheral vascular diseases' to define sickness absences due to diseases of the circulatory system. For mental health, we included the category 'Mental disorders' (except psychosis) plus some additional mental health related codes from the RCGP category 'Symptoms and Ill-defined conditions' such as 'stress'.<sup>3</sup>

## References

1. Morois S, Airagnes G, Lemogne C, et al. Daily alcohol consumption and sickness absence in the GAZEL cohort. *Eur J Public Health* 2017; **27**: 482-8.
2. World Health Organization. International statistical classification of diseases and related health problems (ICD-10): World Health Organization; 1994.
3. Head J, Ferrie JE, Alexanderson K, et al. Diagnosis-specific sickness absence as a predictor of mortality: the Whitehall II prospective cohort study. *BMJ* 2008; **337**: a1469.

## **Description of covariates**

The covariates included age, sex, socioeconomic status (SES), and chronic disease. SES was based on occupational class, except in HeSSup, in which information on occupational class was unavailable and SES was based on vocational educational attainment. In FPS and GAZEL, SES was based on register data, and in HeSSup and Whitehall II, it was based on self-reports. High SES included administrators, managers, experts, and specialists; and in HeSSup, those with a university/polytechnic degree. Intermediate SES included skilled non-manual occupations, such as higher executive officers (Whitehall II), office workers, customer service workers, sales workers, and hospital nurses; and in HeSSup, those with a college-level education. Low SES included manual workers, such as those in construction, manufacturing, and transportation; in HeSSup, those with vocational school, vocational course, and apprenticeship training or no vocational education; and in Whitehall II, low SES included clerical and office support workers.

In FPS and HeSSup, information on chronic disease was derived from health registers and a check-list administered in the survey, and included coronary heart disease, stroke, diabetes, lung disease, asthma, cancer, musculoskeletal disease, and mental disorders. In GAZEL, it was derived from survey questions on asthma, hypertension, angina, myocardial infarction, stroke, rheumatoid arthritis, diabetes, and cancer. Whitehall II used survey responses regarding the presence of any longstanding illness (yes/no) and the type of disease. Chronic disease was defined as coronary heart disease, stroke, respiratory disease, asthma, musculoskeletal disease, cancer, depression, or other mental disorder.

## Description of Population Attributable Fraction (PAF)

We used the following formula to calculate PAF:

$$PAF \text{ in group } j = P_j(RR_j - 1) / [(\sum_{i=1}^K P_i(RR_i - 1)) + 1],$$

where  $P_i$  = proportion of the population in group  $i$ ;  $RR_i$  = rate ratio in group  $i$ ;  $K$  = number of non-reference risk groups

**Reference:** Hanley JA. A heuristic approach to the formulas for population attributable fraction. *J Epidemiol Community Health* 2001;55:508-14.

PAFs were calculated for both the current data and the external source-derived prevalence levels of the risk factors. We estimated 95% confidence intervals for PAF using 95% confidence intervals for summary rate ratios across all four cohort studies.

### Data sources for external prevalences:

Smoking, heavy episodic drinking, overweight and obesity:  
EUROSTAT (<https://ec.europa.eu/eurostat>, accessed Sept 5, 2018)

Alcohol consumption:

Wood AM, Kaptoge S, Butterworth AS, et al. Risk thresholds for alcohol consumption: combined analysis of individual-participant data for 599 912 current drinkers in 83 prospective studies. *Lancet* 2018; 391: 1513–23.

Low physical activity:

Guthold R, Stevens GA, Riley LM, Bull FC. Worldwide trends in insufficient physical activity from 2001 to 2016: a pooled analysis of 358 population-based surveys with 1.9 million participants. *Lancet Glob Health* 2018; Published Online September 4, 2018 [http://dx.doi.org/10.1016/S2214-109X\(18\)30357-7](http://dx.doi.org/10.1016/S2214-109X(18)30357-7).

**Supplementary Table 1: Rate ratio (RR) and 95% confidence intervals (CI) for association between lifestyle factors and sickness absence due to musculoskeletal diseases in each study cohort**

| Lifestyle factor and study cohort | RR*  | (95% CI)*   |
|-----------------------------------|------|-------------|
| Smoking                           |      |             |
| FPS                               | 1.38 | (1.24-1.53) |
| HESSUP                            | 1.46 | (1.13-1.88) |
| GAZEL                             | 0.82 | (0.64-1.05) |
| Whitehall II                      | 2.65 | (1.84-3.83) |
| High alcohol consumption          |      |             |
| FPS                               | 0.99 | (0.88-1.11) |
| HESSUP                            | 0.89 | (0.69-1.14) |
| GAZEL                             | 1.07 | (0.86-1.33) |
| Whitehall II                      | 1.88 | (1.36-2.59) |
| Heavy episodic drinking           |      |             |
| FPS                               | 0.99 | (0.85-1.16) |
| HESSUP                            | 1.09 | (0.80-1.50) |
| Overweight                        |      |             |
| FPS                               | 1.29 | (1.18-1.41) |
| HESSUP                            | 1.37 | (1.10-1.71) |
| GAZEL                             | 1.18 | (0.95-1.46) |
| Whitehall II                      | 1.55 | (1.16-2.06) |
| Obesity                           |      |             |
| FPS                               | 1.63 | (1.44-1.85) |
| HESSUP                            | 1.84 | (1.33-2.55) |
| GAZEL                             | 1.57 | (1.10-2.25) |
| Whitehall II                      | 0.86 | (0.55-1.37) |
| Low physical activity             |      |             |
| FPS                               | 1.23 | (1.11-1.36) |
| HESSUP                            | 1.06 | (0.83-1.36) |
| GAZEL                             | 1.34 | (1.09-1.64) |
| Whitehall II                      | 1.37 | (0.97-1.91) |

\*Adjusted for age, sex, socioeconomic status and chronic disease.



**Supplementary Table 2: Rate ratio (RR) and 95% confidence intervals (CI) for association between lifestyle factors and sickness absence due to depressive disorders in each study cohort**

| Lifestyle factor and study cohort | RR*  | (95 % CI)*  |
|-----------------------------------|------|-------------|
| <b>Smoking</b>                    |      |             |
| FPS                               | 1.56 | (1.24-1.96) |
| HESSUP                            | 1.36 | (0.83-2.23) |
| GAZEL                             | 2.52 | (1.51-4.23) |
| Whitehall II                      | 2.10 | (1.34-3.29) |
| <b>High alcohol consumption</b>   |      |             |
| FPS                               | 1.20 | (0.95-1.51) |
| HESSUP                            | 0.85 | (0.51-1.41) |
| GAZEL                             | 1.07 | (0.68-1.68) |
| Whitehall II                      | 2.30 | (1.53-3.46) |
| <b>Heavy episodic drinking</b>    |      |             |
| FPS                               | 1.82 | (1.30-2.54) |
| HESSUP                            | 2.22 | (1.15-4.29) |
| <b>Overweight</b>                 |      |             |
| FPS                               | 1.01 | (0.84-1.23) |
| HESSUP                            | 0.87 | (0.56-1.37) |
| GAZEL                             | 1.79 | (1.16-2.75) |
| Whitehall II                      | 1.01 | (0.71-1.44) |
| <b>Obesity</b>                    |      |             |
| FPS                               | 1.20 | (0.92-1.56) |
| HESSUP                            | 1.55 | (0.81-2.96) |
| GAZEL                             | 2.32 | (1.12-4.81) |
| Whitehall II                      | 1.80 | (1.01-3.22) |
| <b>Low physical activity</b>      |      |             |
| FPS                               | 1.71 | (1.38-2.11) |
| HESSUP                            | 1.47 | (0.90-2.41) |
| GAZEL                             | 1.73 | (1.12-2.66) |
| Whitehall II                      | 1.61 | (1.07-2.40) |

\*Adjusted for age, sex, socioeconomic status and chronic disease.

**Supplementary Table 3: Rate ratio (RR) and 95% confidence intervals (CI) for association between lifestyle factors and sickness absence due to external causes in each study cohort**

| Lifestyle factor and study cohort | RR*  | (95% CI)*   |
|-----------------------------------|------|-------------|
| Smoking                           |      |             |
| FPS                               | 1.45 | (1.23-1.71) |
| HESSUP                            | 1.27 | (0.90-1.79) |
| GAZEL                             | 1.43 | (1.08-1.89) |
| Whitehall II                      | 0.92 | (0.63-1.34) |
| High alcohol consumption          |      |             |
| FPS                               | 1.37 | (1.15-1.63) |
| HESSUP                            | 1.21 | (0.86-1.71) |
| GAZEL                             | 1.25 | (0.98-1.59) |
| Whitehall II                      | 0.75 | (0.55-1.03) |
| Heavy episodic drinking           |      |             |
| FPS                               | 1.61 | (1.26-2.06) |
| HESSUP                            | 1.72 | (1.13-2.63) |
| Overweight                        |      |             |
| FPS                               | 1.33 | (1.16-1.53) |
| HESSUP                            | 1.02 | (0.75-1.39) |
| GAZEL                             | 1.06 | (0.83-1.34) |
| Whitehall II                      | 1.06 | (0.79-1.42) |
| Obesity                           |      |             |
| FPS                               | 1.49 | (1.23-1.81) |
| HESSUP                            | 1.27 | (0.82-1.98) |
| GAZEL                             | 1.12 | (0.75-1.66) |
| Whitehall II                      | 2.42 | (1.53-3.83) |
| Low physical activity             |      |             |
| FPS                               | 0.95 | (0.82-1.11) |
| HESSUP                            | 0.89 | (0.63-1.26) |
| GAZEL                             | 0.81 | (0.64-1.02) |
| Whitehall II                      | 1.24 | (0.88-1.74) |

\*Adjusted for age, sex, socioeconomic status and chronic disease.

**Supplementary Table 4: Rate ratio (RR) and 95% confidence intervals (CI) for association between lifestyle factors and sickness absence due to circulatory diseases in each study cohort**

| Lifestyle factor and study cohort | RR*  | (95% CI)*   |
|-----------------------------------|------|-------------|
| Smoking                           |      |             |
| FPS                               | 1.61 | (1.24-2.08) |
| HESSUP                            | 1.27 | (0.69-2.31) |
| GAZEL                             | 1.92 | (1.18-3.15) |
| Whitehall II                      | 1.27 | (0.37-4.30) |
| High alcohol consumption          |      |             |
| FPS                               | 0.73 | (0.55-0.96) |
| HESSUP                            | 0.98 | (0.52-1.85) |
| GAZEL                             | 1.27 | (0.83-1.93) |
| Whitehall II                      | 0.77 | (0.28-2.09) |
| Heavy episodic drinking           |      |             |
| FPS                               | 1.13 | (0.77-1.67) |
| HESSUP                            | 1.55 | (0.74-3.25) |
| Overweight                        |      |             |
| FPS                               | 1.34 | (1.07-1.68) |
| HESSUP                            | 1.17 | (0.69-1.97) |
| GAZEL                             | 0.76 | (0.51-1.15) |
| Whitehall II                      | 0.97 | (0.39-2.42) |
| Obesity                           |      |             |
| FPS                               | 1.69 | (1.24-2.30) |
| HESSUP                            | 1.83 | (0.87-3.85) |
| GAZEL                             | 2.50 | (1.27-4.93) |
| Whitehall II                      | 2.15 | (0.47-9.89) |
| Low physical activity             |      |             |
| FPS                               | 1.09 | (0.85-1.41) |
| HESSUP                            | 1.22 | (0.67-2.21) |
| GAZEL                             | 2.08 | (1.39-3.10) |
| Whitehall II                      | 0.37 | (0.12-1.10) |

\*Adjusted for age, sex, socioeconomic status and chronic disease.

**Supplementary Table 5: Rate ratio (RR) and 95% confidence intervals (CI) for association between lifestyle factors and sickness absence due to respiratory diseases in each study cohort**

| Lifestyle factor and study cohort | RR*  | (95% CI)*   |
|-----------------------------------|------|-------------|
| Smoking                           |      |             |
| FPS                               | 1.50 | (1.21-1.86) |
| HESSUP                            | 1.29 | (0.76-2.19) |
| GAZEL                             | 1.27 | (1.05-1.53) |
| Whitehall II                      | 1.19 | (1.03-1.36) |
| High alcohol consumption          |      |             |
| FPS                               | 1.10 | (0.89-1.37) |
| HESSUP                            | 0.88 | (0.52-1.49) |
| GAZEL                             | 1.01 | (0.85-1.19) |
| Whitehall II                      | 1.15 | (1.02-1.29) |
| Heavy episodic drinking           |      |             |
| FPS                               | 1.35 | (0.99-1.84) |
| HESSUP                            | 1.27 | (0.66-2.45) |
| Overweight                        |      |             |
| FPS                               | 1.12 | (0.94-1.34) |
| HESSUP                            | 0.96 | (0.59-1.56) |
| GAZEL                             | 0.93 | (0.79-1.09) |
| Whitehall II                      | 1.02 | (0.92-1.14) |
| Obesity                           |      |             |
| FPS                               | 1.76 | (1.37-2.25) |
| HESSUP                            | 2.26 | (1.20-4.25) |
| GAZEL                             | 1.12 | (0.86-1.46) |
| Whitehall II                      | 1.36 | (1.14-1.62) |
| Low physical activity             |      |             |
| FPS                               | 1.50 | (1.22-1.84) |
| HESSUP                            | 1.75 | (1.06-2.89) |
| GAZEL                             | 1.40 | (1.19-1.64) |
| Whitehall II                      | 1.28 | (1.13-1.46) |

\*Adjusted for age, sex, socioeconomic status and chronic disease.

**Supplementary Table 6: Rate ratio (RR) and 95% confidence intervals (CI) for association between lifestyle factors and sickness absence due to digestive diseases in each study cohort**

| Lifestyle factor and study cohort | RR*  | (95% CI)*   |
|-----------------------------------|------|-------------|
| Smoking                           |      |             |
| FPS                               | 1.21 | (0.92-1.60) |
| HESSUP                            | 0.96 | (0.56-1.64) |
| GAZEL                             | 0.83 | (0.61-1.13) |
| Whitehall II                      | 1.47 | (1.00-2.17) |
| High alcohol consumption          |      |             |
| FPS                               | 0.91 | (0.69-1.20) |
| HESSUP                            | 0.91 | (0.54-1.53) |
| GAZEL                             | 1.30 | (0.98-1.71) |
| Whitehall II                      | 1.13 | (0.80-1.59) |
| Heavy episodic drinking           |      |             |
| FPS                               | 0.79 | (0.53-1.17) |
| HESSUP                            | 0.94 | (0.49-1.83) |
| Overweight                        |      |             |
| FPS                               | 0.98 | (0.78-1.23) |
| HESSUP                            | 1.06 | (0.65-1.71) |
| GAZEL                             | 1.22 | (0.93-1.61) |
| Whitehall II                      | 0.70 | (0.52-0.95) |
| Obesity                           |      |             |
| FPS                               | 1.63 | (1.19-2.23) |
| HESSUP                            | 1.40 | (0.71-2.77) |
| GAZEL                             | 1.85 | (1.17-2.92) |
| Whitehall II                      | 1.71 | (1.04-2.82) |
| Low physical activity             |      |             |
| FPS                               | 1.35 | (1.05-1.74) |
| HESSUP                            | 0.71 | (0.42-1.19) |
| GAZEL                             | 1.48 | (1.15-1.90) |
| Whitehall II                      | 1.04 | (0.75-1.46) |

\*Adjusted for age, sex, socioeconomic status and chronic disease.

**Supplementary Figure 1: Rate ratio (RR) and 95% confidence intervals (CI) from meta-analyses for association between lifestyle factors and diagnosis-specific sickness absence in the subgroups of sick-listed participants, adjusted for age, sex, socioeconomic status and chronic disease. Outcomes are sickness absence at follow-up due to the same diagnosis (longer duration or repeated absence)**

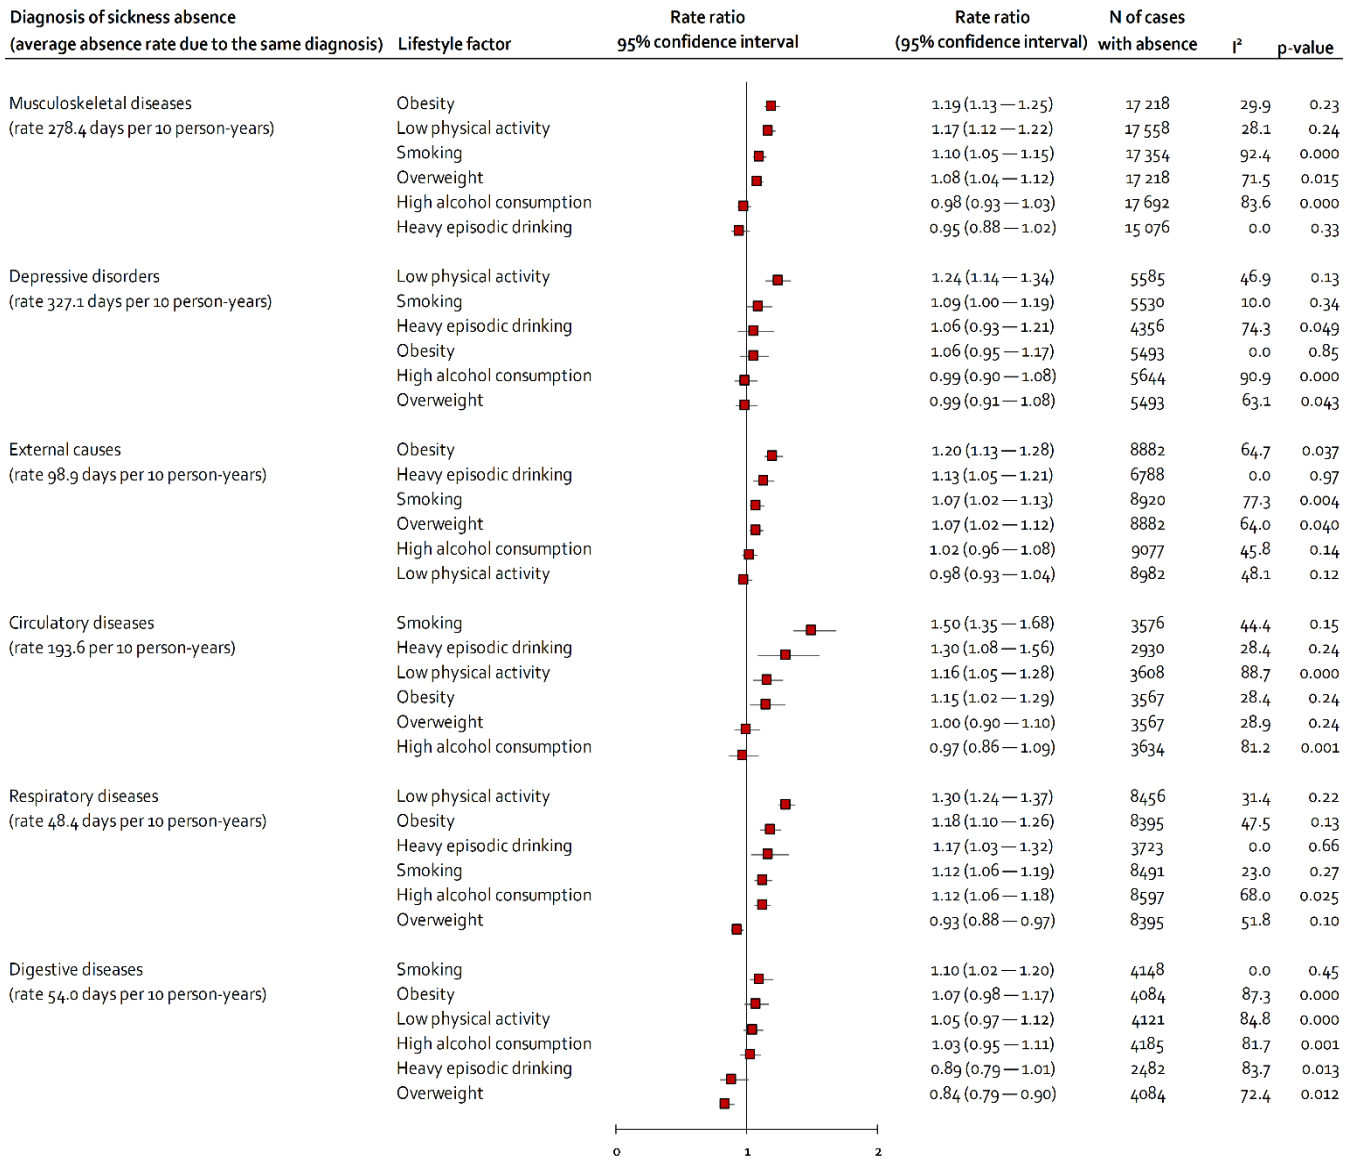

**Supplementary Figure 2: Rate ratio (RR) and 95% confidence intervals (CI) from meta-analyses for association between lifestyle factors and diagnosis-specific sickness absence in the subgroups of sick-listed participants, adjusted for age, sex, socioeconomic status and chronic disease. Outcomes are sickness absence at follow-up due to other diagnoses (multiple-causes absence)**

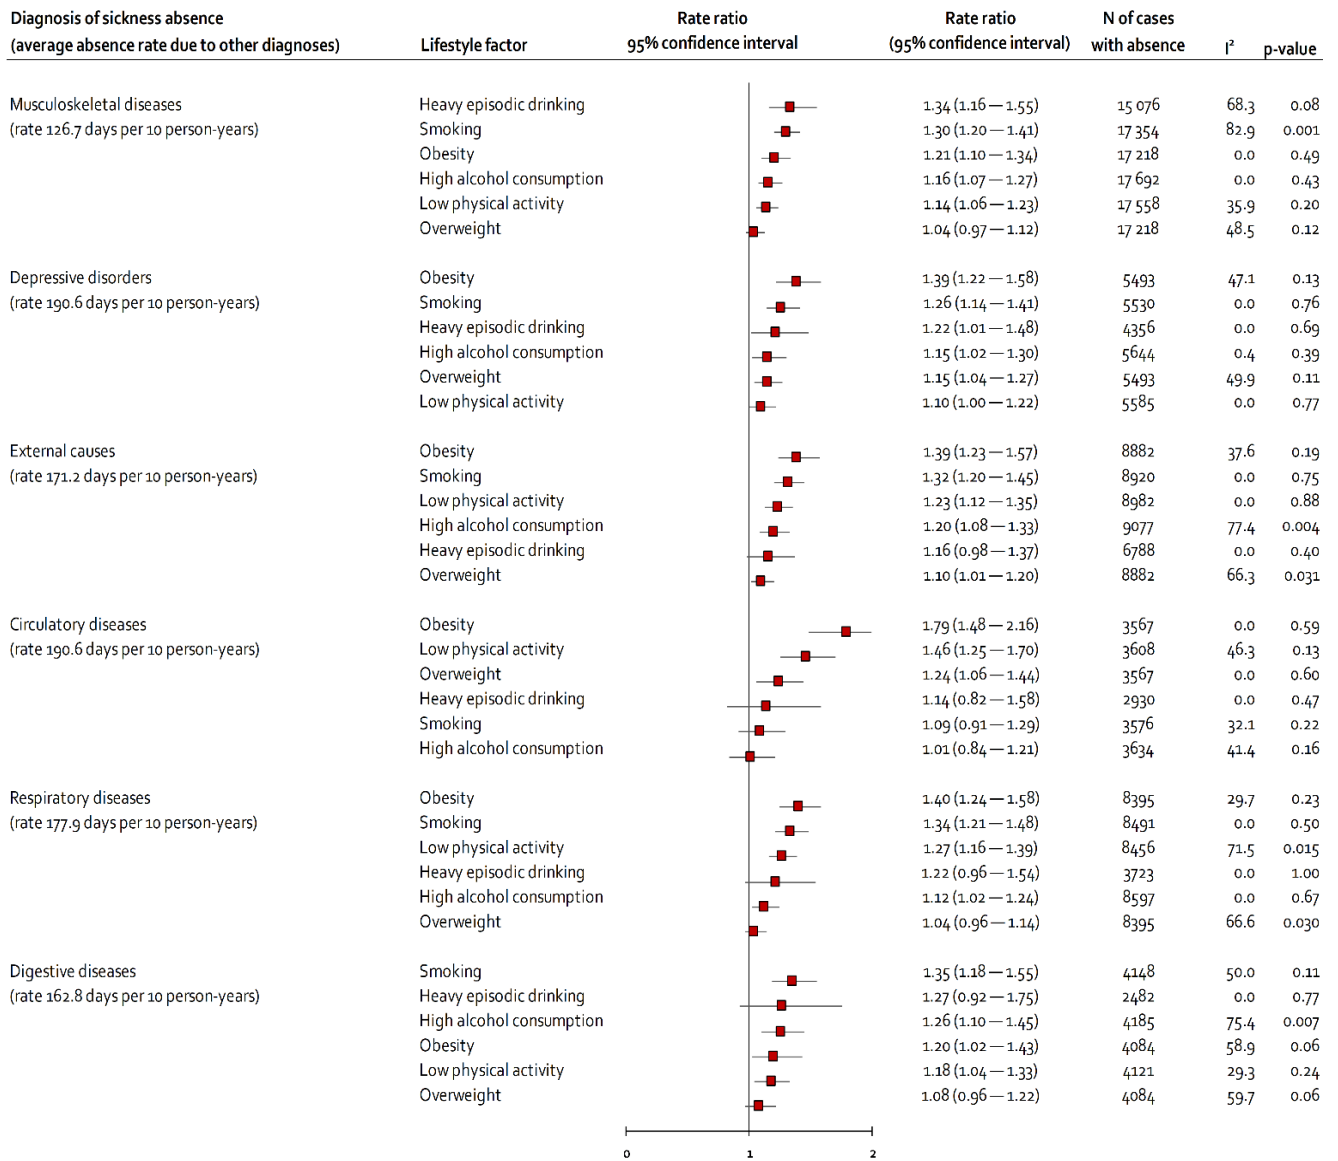

**Supplementary Table 7: Summary estimates from meta-analyses for association between lifestyle factors and sickness absence days due to specific diagnoses in the total population of three cohort studies (FPS, HeSSup, Gazel), excluding the Whitehall II cohort**

|                                | Depressive disorders                                | Circulatory diseases                             | Musculoskeletal diseases                        | Digestive diseases                              | Respiratory diseases                              | External causes                                  |
|--------------------------------|-----------------------------------------------------|--------------------------------------------------|-------------------------------------------------|-------------------------------------------------|---------------------------------------------------|--------------------------------------------------|
| Lifestyle factors              | Rate ratio (95% CI)*                                | Rate ratio (95% CI)*                             | Rate ratio (95% CI)*                            | Rate ratio (95% CI)*                            | Rate ratio (95% CI)*                              | Rate ratio (95% CI)*                             |
| Smoking (n=68 166)             |                                                     |                                                  |                                                 |                                                 |                                                   |                                                  |
| Non-smoking                    | 1.00                                                | 1.00                                             | 1.00                                            | 1.00                                            | 1.00                                              | 1.00                                             |
| Smoking                        | 1.63 (1.35-1.98)                                    | 1.62 (1.30-2.00)                                 | 1.30 (1.18-1.42)                                | 1.01 (0.84-1.23)                                | 1.36 (1.19-1.56)                                  | 1.42 (1.24-1.62)                                 |
| I <sup>2</sup> (p-value)       | 41.3% (0.18)                                        | 0.0% (0.58)                                      | 87.0% (0.000)                                   | 38.0% (0.20)                                    | 0.0% (0.51)                                       | 0.0% (0.79)                                      |
| Alcohol consumption (n=69 141) |                                                     |                                                  |                                                 |                                                 |                                                   |                                                  |
| Moderate                       | 1.00                                                | 1.00                                             | 1.00                                            | 1.00                                            | 1.00                                              | 1.00                                             |
| High consumption               | 1.12 (0.93-1.36)                                    | 0.88 (0.70-1.09)                                 | 0.99 (0.90-1.09)                                | 1.06 (0.88-1.28)                                | 1.03 (0.91-1.17)                                  | 1.31 (1.15-1.49)                                 |
| I <sup>2</sup> (p-value)       | 0.0% (0.47)                                         | 57.8% (0.09)                                     | 0.0% (0.56)                                     | 43.9 (0.17)                                     | 0.0% (0.69)                                       | 0.0% (0.74)                                      |
| Body mass index (n=67 622)     |                                                     |                                                  |                                                 |                                                 |                                                   |                                                  |
| Normal weight                  | 1.00                                                | 1.00                                             | 1.00                                            | 1.00                                            | 1.00                                              | 1.00                                             |
| Overweight                     | 1.07 (0.91-1.26)                                    | 1.17 (0.97-1.41)                                 | 1.28 (1.19-1.39)                                | 1.07 (0.91-1.26)                                | 1.01 (0.90-1.13)                                  | 1.22 (1.09-1.37)                                 |
| Obesity                        | 1.33 (1.05-1.67)                                    | 1.81 (1.39-2.35)                                 | 1.65 (1.47-1.84)                                | 1.66 (1.30-2.11)                                | 1.48 (1.24-1.76)                                  | 1.39 (1.18-1.64)                                 |
| I <sup>2</sup> (p-value)       | Overweight: 69.8% (0.036);<br>Obesity: 34.1% (0.22) | Overweight: 65.0% (0.06)<br>Obesity: 0.0% (0.59) | Overweight: 0.0% (0.63)<br>Obesity: 0.0% (0.76) | Overweight: 0.0% (0.48)<br>Obesity: 0.0% (0.79) | Overweight: 15.2% (0.31)<br>Obesity: 74.5 (0.020) | Overweight: 51.3% (0.13)<br>Obesity: 0.0% (0.41) |
| Physical activity (n=68 544)   |                                                     |                                                  |                                                 |                                                 |                                                   |                                                  |
| Physically active              | 1.00                                                | 1.00                                             | 1.00                                            | 1.00                                            | 1.00                                              | 1.00                                             |
| Low activity                   | 1.68 (1.41-2.01)                                    | 1.30 (1.06-1.59)                                 | 1.23 (1.13-1.34)                                | 1.32 (1.11-1.56)                                | 1.45 (1.29-1.64)                                  | 0.90 (0.80-1.02)                                 |
| I <sup>2</sup> (p-value)       | 0.0% (0.85)                                         | 72.2% (0.028)                                    | 3.2% (0.36)                                     | 68.1% (0.043)                                   | 0.0% (0.66)                                       | 0.0% (0.53)                                      |

\*Adjusted for age, sex, socioeconomic status and chronic disease.



**Supplementary Table 8: Summary estimates from meta-analyses for association between lifestyle factors and sickness absence days due to specific diagnoses in the total population of three cohort studies (FPS, HeSSup, Whitehall II), excluding the GAZEL cohort**

|                                       | Depressive disorders                            | Circulatory diseases                            | Musculoskeletal diseases                          | Digestive diseases                               | Respiratory diseases                             | External causes                                   |
|---------------------------------------|-------------------------------------------------|-------------------------------------------------|---------------------------------------------------|--------------------------------------------------|--------------------------------------------------|---------------------------------------------------|
| Lifestyle factors                     | Rate ratio (95% CI)*                            | Rate ratio (95% CI)*                            | Rate ratio (95% CI)*                              | Rate ratio (95% CI)*                             | Rate ratio (95% CI)*                             | Rate ratio (95% CI)*                              |
| <b>Smoking (n=62 129)</b>             |                                                 |                                                 |                                                   |                                                  |                                                  |                                                   |
| Non-smoking                           | 1.00                                            | 1.00                                            | 1.00                                              | 1.00                                             | 1.00                                             | 1.00                                              |
| Smoking                               | 1.61 (1.33-1.95)                                | 1.54 (1.22-1.95)                                | 1.45 (1.32-1.59)                                  | 1.24 (1.00-1.52)                                 | 1.27 (1.14-1.43)                                 | 1.34 (1.16-1.53)                                  |
| <i>I</i> <sup>2</sup> (p-value)       | 0.0% (0.39)                                     | 0.0% (0.74)                                     | 82.2% (0.004)                                     | 0.0% (0.44)                                      | 36.4% (0.21)                                     | 58.2% (0.09)                                      |
| <b>Alcohol consumption (n=63 316)</b> |                                                 |                                                 |                                                   |                                                  |                                                  |                                                   |
| Moderate                              | 1.00                                            | 1.00                                            | 1.00                                              | 1.00                                             | 1.00                                             | 1.00                                              |
| High consumption                      | 1.31 (1.09-1.58)                                | 0.77 (0.60-0.98)                                | 1.04 (0.94-1.14)                                  | 0.98 (0.80-1.19)                                 | 1.13 (1.02-1.25)                                 | 1.19 (1.04-1.37)                                  |
| <i>I</i> <sup>2</sup> (p-value)       | 81.2% (0.005)                                   | 0.0% (0.71)                                     | 86.8% (0.001)                                     | 0.0% (0.60)                                      | 0.0% (0.60)                                      | 81.5% (0.004)                                     |
| <b>Body mass index (n=61 542)</b>     |                                                 |                                                 |                                                   |                                                  |                                                  |                                                   |
| Normal weight                         | 1.00                                            | 1.00                                            | 1.00                                              | 1.00                                             | 1.00                                             | 1.00                                              |
| Overweight                            | 0.99 (0.85-1.16)                                | 1.29 (1.06-1.58)                                | 1.32 (1.22-1.43)                                  | 0.89 (0.75-1.05)                                 | 1.04 (0.95-1.14)                                 | 1.24 (1.10-1.39)                                  |
| Obesity                               | 1.32 (1.05-1.65)                                | 1.72 (1.30-2.28)                                | 1.59 (1.42-1.78)                                  | 1.62 (1.26-2.07)                                 | 1.51 (1.32-1.74)                                 | 1.55 (1.32-1.83)                                  |
| <i>I</i> <sup>2</sup> (p-value)       | Overweight: 0.0% (0.83)<br>Obesity: 0.0% (0.40) | Overweight: 0.0% (0.74)<br>Obesity: 0.0% (0.94) | Overweight: 0.0% (0.46)<br>Obesity: 74.7% (0.019) | Overweight: 44.9% (0.16)<br>Obesity: 0.0% (0.90) | Overweight: 0.0% (0.64)<br>Obesity: 54.4% (0.11) | Overweight: 44.8% (0.16)<br>Obesity: 56.2% (0.10) |
| <b>Physical activity (n=62 204)</b>   |                                                 |                                                 |                                                   |                                                  |                                                  |                                                   |
| Physically active                     | 1.00                                            | 1.00                                            | 1.00                                              | 1.00                                             | 1.00                                             | 1.00                                              |
| Low activity                          | 1.66 (1.39-1.98)                                | 1.06 (0.84-1.33)                                | 1.21 (1.11-1.33)                                  | 1.14 (0.95-1.38)                                 | 1.35 (1.22-1.51)                                 | 0.98 (0.86-1.11)                                  |
| <i>I</i> <sup>2</sup> (p-value)       | 0.0% (0.85)                                     | 46.3% (0.15)                                    | 0.0% (0.43)                                       | 61.5% (0.08)                                     | 25.9% (0.26)                                     | 12.6% (0.32)                                      |

\*Adjusted for age, sex, socioeconomic status and chronic disease.
